# Supplementary material
Source: PubMed Central journal article supplement (PMC9206474)
Supplement: Suppl_FigureS1.pdf [file Suppl_FigureS1.pdf]

# Ethics

- Professional certification available
- Informs hospital policies and care practices
- Articulates underlying ethical values or principles justifying the ethical acceptable range of options for care
- Mitigates values conflicts
- Provides education to staff about ethical principles underlying care
- Provides an institutional check on high profile or high risk processes, e.g., neuro-criteria death scenarios, requests for prognostic nondisclosure
- Can be requested independently by any impacted member: families, clinicians, patients, hospital administrators

# Palliative

- Consult-based model
- Interprofessional team
- Complex family meetings
- Patient/family and staff support
- Attends to moral distress
- Early integration improves outcomes
- Shared decision making
- Elicits patient/family values related to care decisions
- Facilitates clear and open communication between patients and clinicians
- Helps identify appropriate surrogate decision makers for patients without decision-making capacity

- Board-Licensure and Accreditation options
- Elicits patient/family understanding of their clinical course and prognosis
- Complex symptom management
- Quality of life
- End-of-life care
- Continuity in care
- Usually consulted by clinical teams caring for a patient

Figure 1. Venn Diagram
